# Supplementary material
Source: PubMed Central journal article supplement (PMC2947607)
Supplement: NIHMS227879-supplement-1_si_001.pdf [file NIHMS227879-supplement-1_si_001.pdf]

# Radially Aligned, Electrospun Nanofibers as Dural Substitutes for Wound Healing and Tissue Regeneration Applications

Jingwei Xie<sup>1†</sup>, Matthew R. MacEwan<sup>1†</sup>, Wilson Z. Ray<sup>2</sup>, Wenying Liu<sup>3</sup>, Daku Y. Siewe<sup>1</sup>, and Younan Xia<sup>1\*</sup>

<sup>1</sup>Department of Biomedical Engineering, Washington University, St. Louis, MO 63130

<sup>2</sup>Department of Neurosurgery, Washington University, School of Medicine, St. Louis, MO 63110

<sup>3</sup>Department of Energy, Environmental & Chemical Engineering, Washington University, St. Louis, MO 63130

<sup>†</sup> These two authors contributed equally to this work.

\*To whom correspondence should be addressed. E-mail: [xia@biomed.wustl.edu](mailto:xia@biomed.wustl.edu)

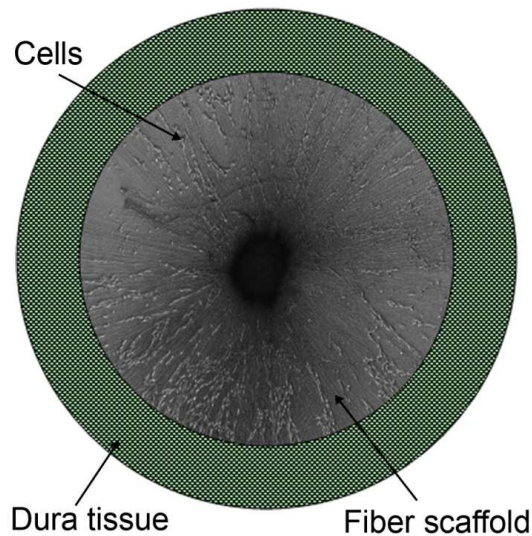

**Figure S1.** Schematic illustrating cell migration from dura tissue placed at the edge of a scaffold made of nanofibers.

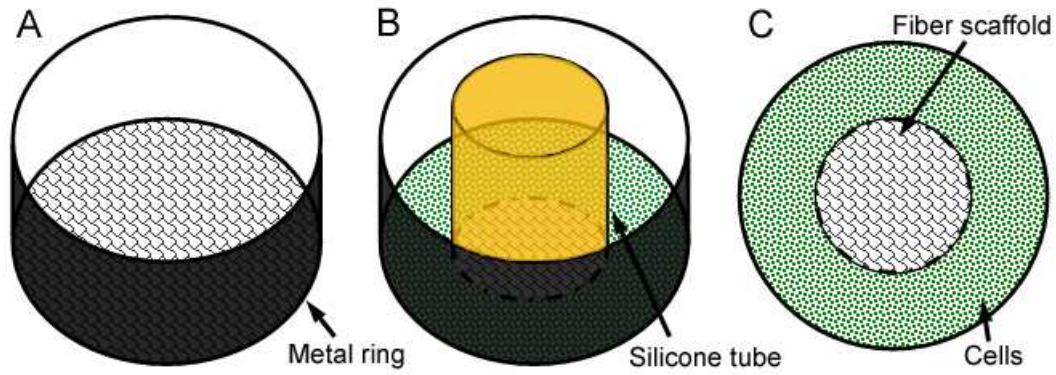

**Figure S2.** Schematic illustrating our home-made cell culture system. (A) A nanofiber-based scaffold was attached to the bottom of a metal ring. (B) A silicone tube was placed at the center of the metal ring prior to cell seeding. (C) A top view showing cells at the surrounding areas and fibers in the center.

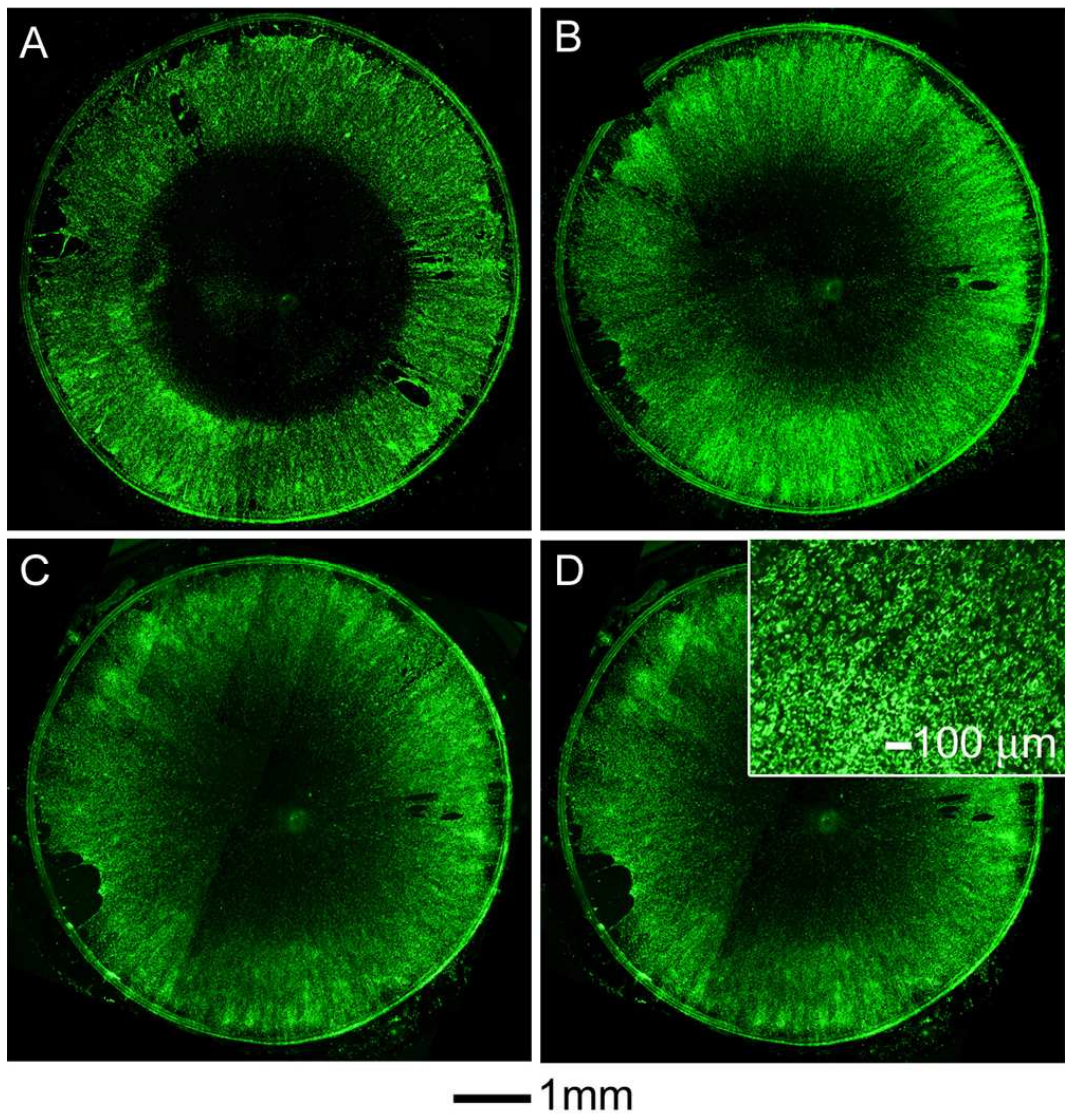

**Figure S3.** Live dural fibroblasts labeled with membrane dye on scaffolds of radially aligned nanofibers with fibronectin coating after (A) 1, (B) 3, (C) 7, and (D) 10-day culture. Inset: a high magnification image of (D), indicating that the cells were also radially aligned.

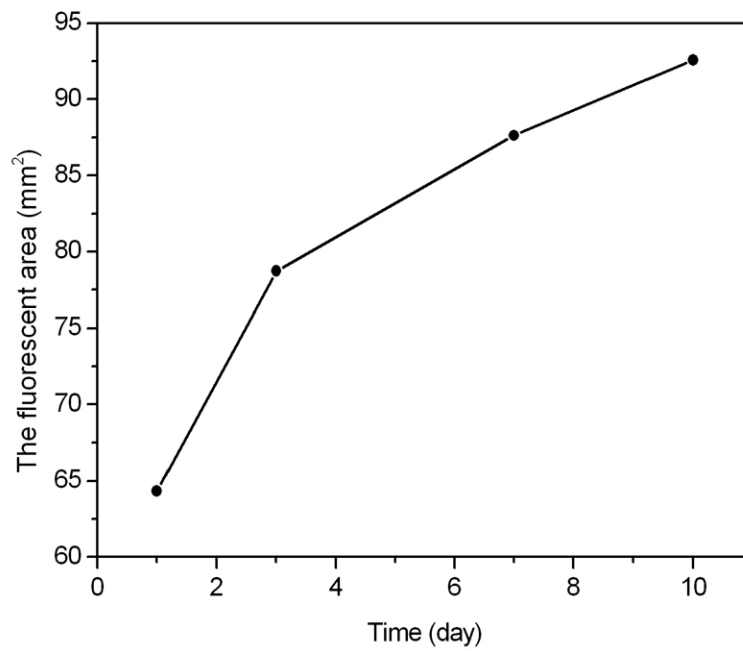

**Figure S4.** The fluorescent area (the area dura cells covered) in Figure S3 was quantified using Image J.

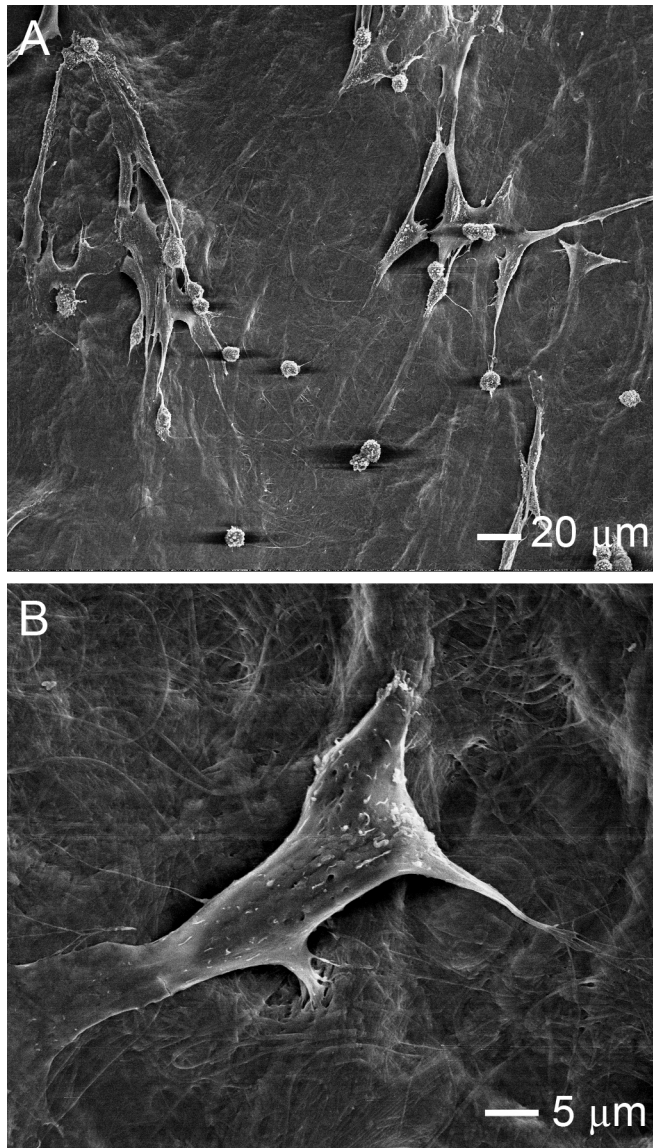

**Figure S5.** SEM images of dura fibroblasts on the DuraMatrix-Onlay™ collagen dura substitute membrane at two different magnifications.
